# Supplementary material for: A lignosulfonate-modified graphene hydrogel with ultrahigh adsorption capacity for Pb(ii) removal
Source: Royal Society of Chemistry journal article supplement (doi:10.1039/c6ta03779h), 2016-01-01
Supplement: c6ta03779h1.pdf [file c6ta03779h1.pdf]

Supporting online materials for

## **Lignosulfonate-modified graphene hydrogel with ultrahigh adsorption capacity for Pb(II) removal**

**Fengfeng Li, Xiluan Wang \*, Tongqi Yuan and Runcang Sun \***

*Beijing Key Laboratory of Lignocellulosic Chemistry, Beijing Forestry University,  
Beijing, 100083, P. R. China.*

*\*Corresponding author: Tel: +86-10-62336903; Fax: +86-10-62336903*

*E-mail address: wangxiluan@bjfu.edu.cn; rcsun3@bjfu.edu.cn*

**Experimental details for GO synthesis.** GO was prepared by the oxidation of natural graphite powder (325 mesh) according to a modified Hummers' method. Briefly, graphite (3.0 g) was added to concentrated sulfuric acid (70 mL) under stirring at room temperature, then sodium nitrate (1.5 g) was added, and the mixture was cooled to 0 °C. Under vigorous agitation, potassium permanganate (9.0 g) was added slowly to keep the temperature of the suspension lower than 20°C. Successively, the reaction system was transferred to a 35–40 °C water bath for about 0.5 h, forming a thick paste. Successively, 140 mL of deionized (DI) water was added, and the solution was stirred for another 15 min. An additional 500 mL of DI water was added and followed by a slow addition of 20 mL of H<sub>2</sub>O<sub>2</sub> (30%), turning the color of the solution from brown to yellow. The mixture was filtered and washed with 1:10 HCl aqueous solution (250 mL) to remove metal ions followed by repeated washing with water and centrifugation to remove the acid.

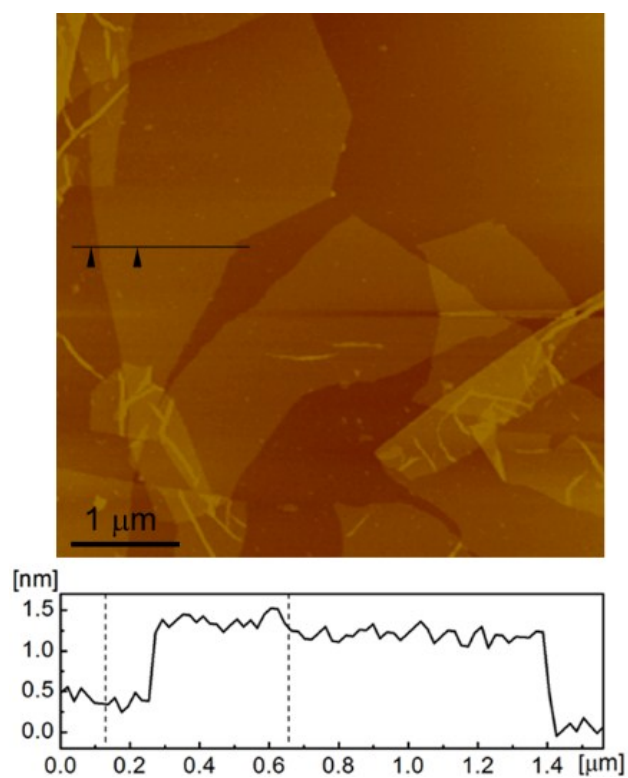

**Figure S1.** The atomic force microscope (AFM) image and height profile of GO sheets on a freshly cleaved mica surface. The heights of GO sheets range from 0.8–1.0 nm, indicating an individual layer. The lateral sizes of most GO sheets are about several micrometers.

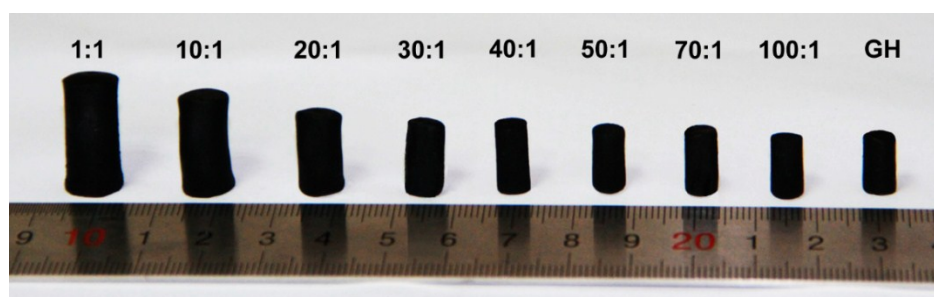

**Figure S2.** A photograph of free-standing LS-GH with mass ratio of GO:LS being 1:1 , 10:1, 20:1, 30:1, 40:1, 50:1, 70:1, 100:1 and pure GH.

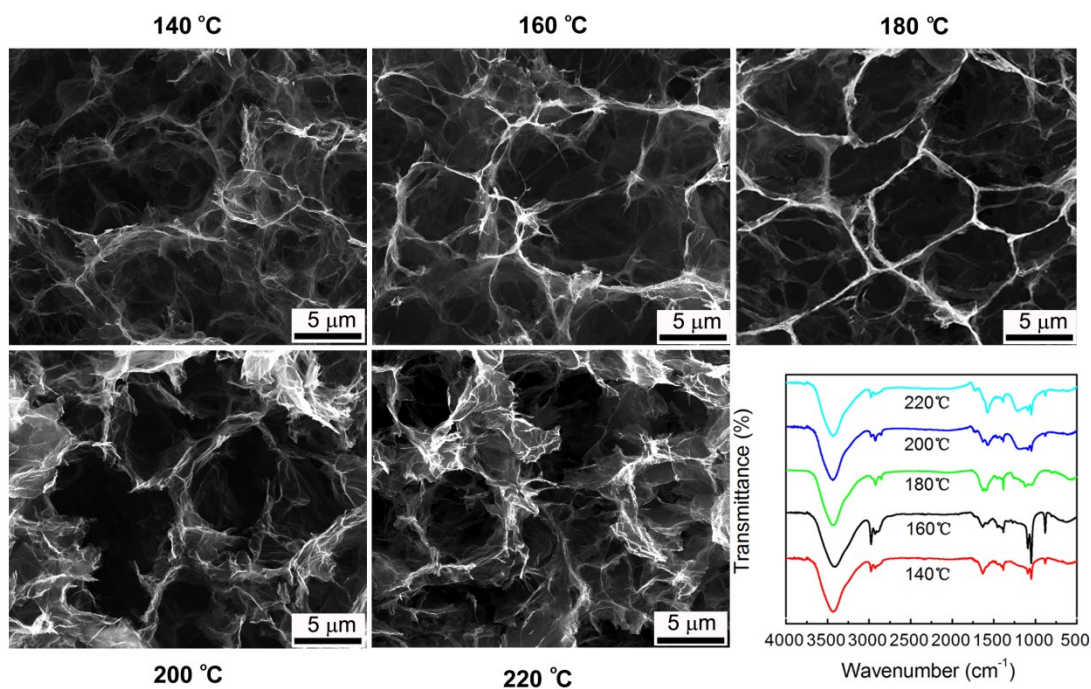

**Figure S3.** SEM images and corresponding FTIR spectra of LS-GH freeze-dried samples (GO:LS = 20:1, GO = 1 mg mL<sup>-1</sup>) treated at 140, 160, 180, 200 and 220 °C.

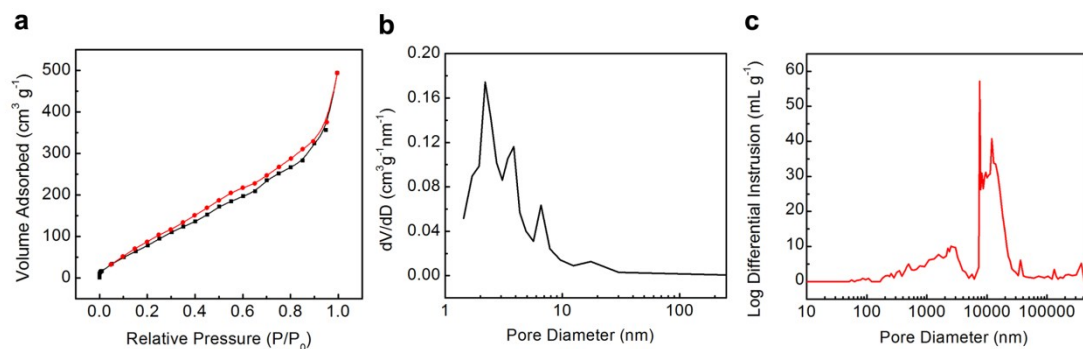

**Figure S4.** (a) Nitrogen adsorption and desorption isotherms, pore size distributions of LS-GH (GO:LS = 20:1, GO = 1 mg mL<sup>-1</sup>) calculated by (b) Barrett-Joyner-Halenda (BJH) method in Nitrogen adsorption and (c) mercury intrusion porosimetry (MIP) method.

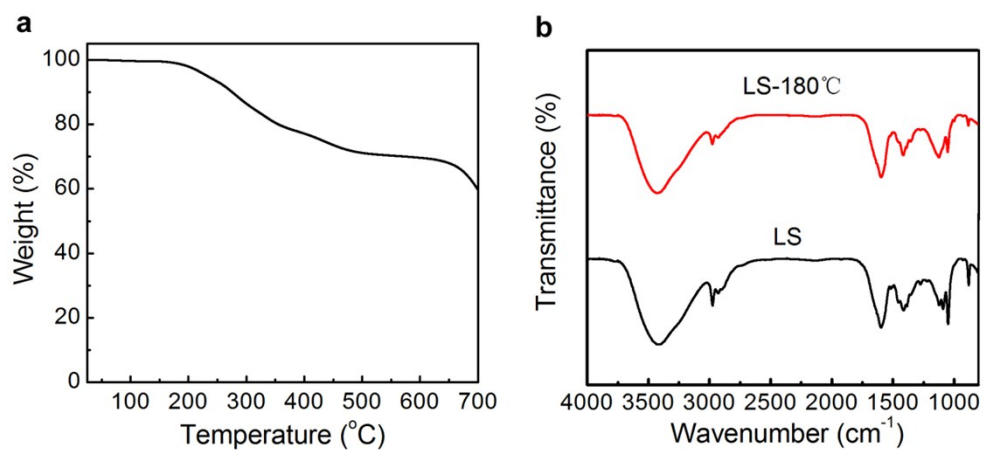

**Figure S5.** (a) TGA curve of pure LS. (b) FTIR spectra of pure LS before (LS) and after (LS-180 °C) hydrothermal treatment.

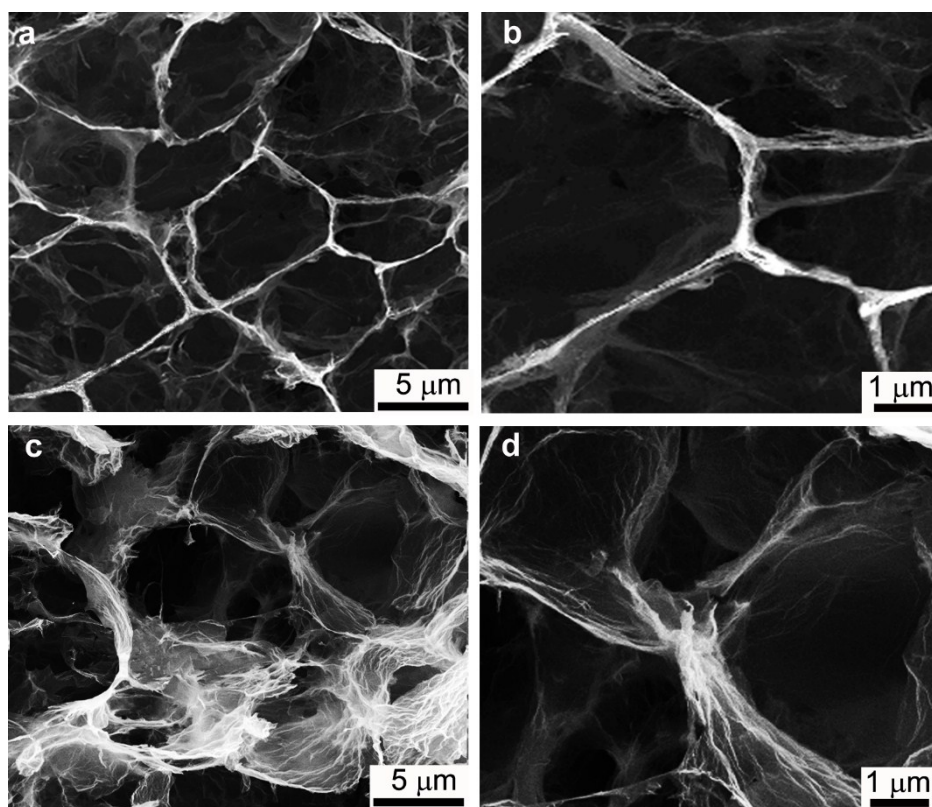

**Figure S6.** SEM images with different magnifications of (a, b) LS-GH (GO:LS = 20:1, GO = 1 mg mL<sup>-1</sup>) and (c, d) GH freeze-dried samples.

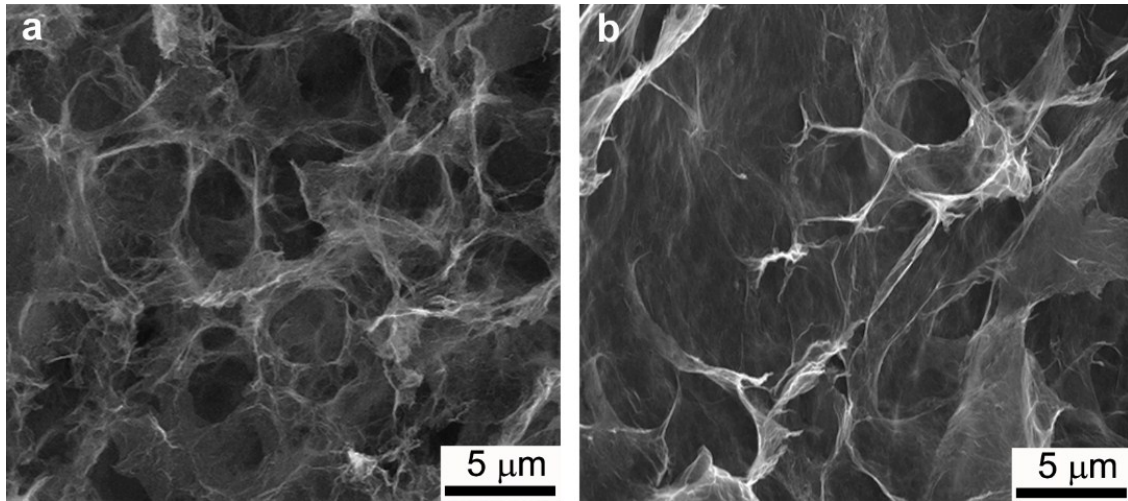

**Figure S7.** SEM images of LS-GH freeze-dried samples with the mass ratios of GO:LS being (a) 10:1 and (b) 1:1.

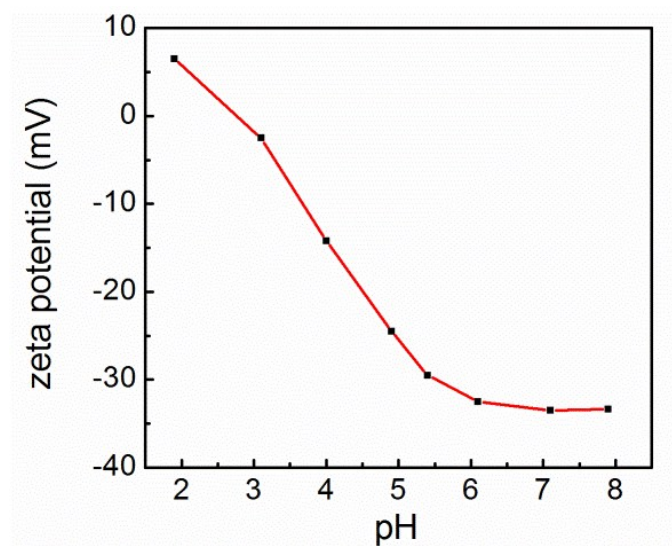

**Figure S8.** Zeta potentials of LS-GH (GO:LS = 20:1, GO = 1 mg mL<sup>-1</sup>) under different pH values.



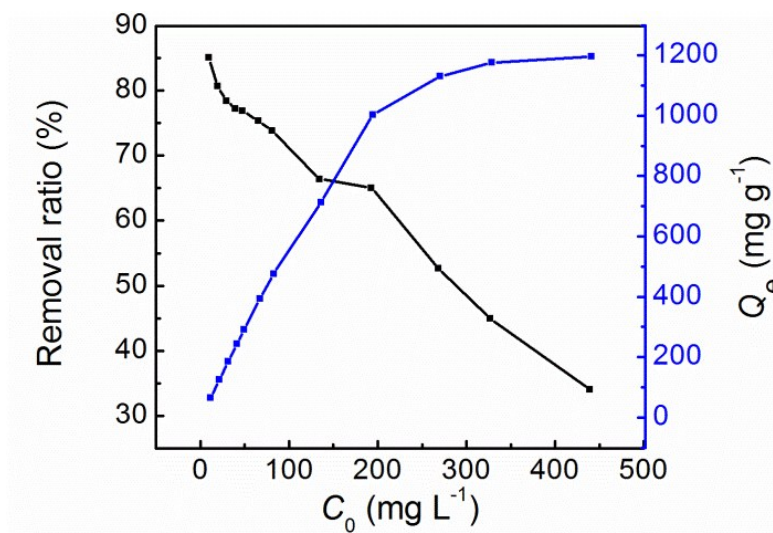

**Figure S9.** The removal ratio of LS-GH (GO:LS = 20:1, GO = 1 mg mL<sup>-1</sup>) toward Pb(II) at different initial concentration of Pb(II).

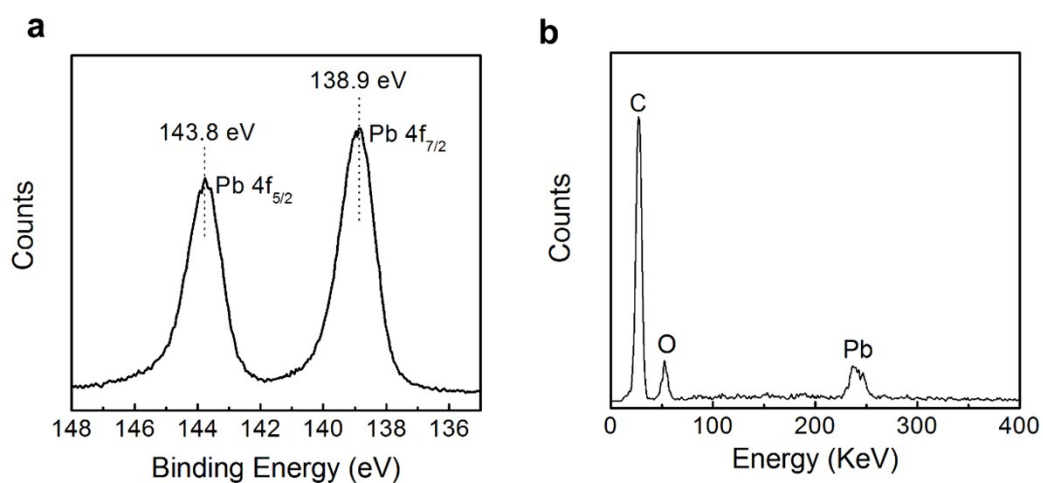

**Figure S10.** (a) XPS spectra of Pb 4f and (b) EDX spectra after adsorbing Pb (II) on LS-GH (GO:LS = 20:1, GO = 1 mg mL<sup>-1</sup>).

**Table S1.** The Pb(II) adsorption capacity of graphene-based and lignin-based adsorbents obtained from the literatures.

| Adsorbent                                      | Adsorption capacity<br>(mg g <sup>-1</sup> ) | Reference |
|------------------------------------------------|----------------------------------------------|-----------|
| Graphene/ $\alpha$ -FeOOH hydrogel             | 373.8                                        | 7         |
| Graphene/ $\delta$ -MnO <sub>2</sub> aerogel   | 643.6                                        | 8         |
| Oxidized CVD-graphene foam                     | 381.3                                        | 9         |
| CVD-grown graphene macroscopic objects         | 882                                          | 10        |
| Graphene aerogel                               | 80                                           | 13        |
| Few layered GO sheets                          | 842                                          | 14        |
| Graphene/CNT aerogel                           | 104.9                                        | 16        |
| Graphene/CNT aerogel / $\alpha$ -FeOOH aerogel | 451                                          | 17        |
| GO-chitosan hydrogel                           | 90                                           | 18        |
| Polydopamine modified graphene hydrogel        | 336.3                                        | 19        |
| GO/CMC porous monolith                         | 76.7                                         | 20        |
| Surface functionalized porous lignin powder    | 188                                          | 26        |
| Lignin-based ion-exchange resin                | 194.5                                        | 27        |
| Graft-polymerized lignosulfonate hydrogel      | 216.3                                        | 29        |
| LS-GO-PANI particle                            | 216.4                                        | 30        |
| Lignin particle                                | 89.4                                         | 31        |
| Lignosulfonate modified graphene hydrogel      | 1210                                         | Our work  |

**Table S2.** Langmuir and Freundlich model fitting parameters for Pb(II) adsorption on LS-GH.

| <b>Isotherm model</b>   | <b>Parameter</b>                                                | <b>Value</b> |
|-------------------------|-----------------------------------------------------------------|--------------|
| <b>Langmuir model</b>   | $Q_m$ (mg g <sup>-1</sup> )                                     | 1250         |
|                         | $K_L \times 10^{-2}$ (L mg <sup>-1</sup> )                      | 5.33         |
|                         | $R^2$                                                           | 0.9931       |
| <b>Freundlich model</b> | $K_F$ (mg g <sup>-1</sup> )(L mg <sup>-1</sup> ) <sup>1/n</sup> | 115.107      |
|                         | $n$                                                             | 2.2045       |
|                         | $R^2$                                                           | 0.9064       |

**Table S3.** Adsorption kinetics fitting results for Pb(II) on LS-GH by pseudo-first-order and pseudo-second-order models.

| <b>Isotherm model</b>            | <b>Parameter</b>                                 | <b>Value</b> |
|----------------------------------|--------------------------------------------------|--------------|
| <b>Pseudo-First-Order Model</b>  | $Q_e$ (mg g <sup>-1</sup> )                      | 865          |
|                                  | $k_1 \times 10^{-2}$ (min <sup>-1</sup> )        | 1.42         |
|                                  | $R^2$                                            | 0.9672       |
| <b>Pseudo-Second-Order Model</b> | $Q_e$ (mg g <sup>-1</sup> )                      | 898          |
|                                  | $k_2 \times 10^{-4}$ [g (mg·min) <sup>-1</sup> ] | 0.347        |
|                                  | $R^2$                                            | 0.9975       |
